# Supplementary material for: Germline CDH1 deletions in hereditary diffuse gastric cancer families
Source: PubMed Central journal article supplement — Hum Mol Genet. 2009 Jan 24;18(9):1545–55. doi: 10.1093/hmg/ddp046 (PMC2667284; doi:10.1093/hmg/ddp046), 2009-01-24
Supplement: ddp046_1.pdf [file ddp046_1.pdf]

## Supplementary Material

**Supplementary table 1.** Primers sequences used in long-range PCR for breakpoints mapping.

| Deletion coordinates    | Primers spanning the putative breakpoints                                         |
|-------------------------|-----------------------------------------------------------------------------------|
| chr16:67193822-67387415 | 5'-AAAAGTATTAAGAGTAAAATGTACATGGAAACAAAAGGGG<br>5'-GAAATTGCCATCATGCCACACGGAAC      |
| chr16:67324886-67330557 | 5'-GACCCCACCAGAGCCCATCCACAGAC<br>5'-GGGGAAACAGTACCTGTATCAAGATGTTTTG               |
| chr16:67328695-67328844 | 5'-CAGCCAATCAGCGGTACGGG<br>5'-CGGGCGGGGGCGGGCGGGCCGGCGTCCCTCGCAAGTCAGG            |
| chr16:67416845-67424923 | 5'-CAAATGATTATCACAGCAAATGAGAGCAAGTCAATTAG<br>5'-CTTTTGGACATCACCACCATGTAAAGAGTGATG |
| chr16:67424298-67425126 | 5'-CTTAAGTTATGTTCTCTAGTAACTTGCTTGG<br>5'-CTTTTGGACATCACCACCATGTAAAGAGTGATG        |

## Electronic-Database Information

The URLs for data presented herein are as follows:

National Center for Biotechnology Information (NCIB), <http://www.ncbi.nlm.nih.gov/>

Online Mendelian Inheritance in Man (OMIM) for CADHERIN 1, *CDH1* (+192090),  
<http://www.ncbi.nlm.nih.gov/Omim/>

The genome database, <http://www.gdb.org>

MRC Holland, <http://www.mlpa.com/pages/indexpag.html>

Ensembl *Homo sapiens* core database, [http://www.ensembl.org/Homo\\_sapiens/Info/Index](http://www.ensembl.org/Homo_sapiens/Info/Index)

UCSC genome browser, <http://biodev.cbm.fvg.it/remo/DEL.txt>

UCSC genome browser Human Mar, <http://genome.ucsc.edu/cgi-bin/hgGateway>
